# Supplementary material for: Absence of cyclin-dependent kinase inhibitor p27 or p18 increases efficiency of iPSC generation without induction of iPSC genomic instability
Source: PubMed Central journal article supplement (PMC6426969; doi:10.1038/s41419-019-1502-8), 2019-03-20
Supplement: 41419_2019_1502_MOESM3_ESM.pdf [file 41419_2019_1502_MOESM3_ESM.pdf]

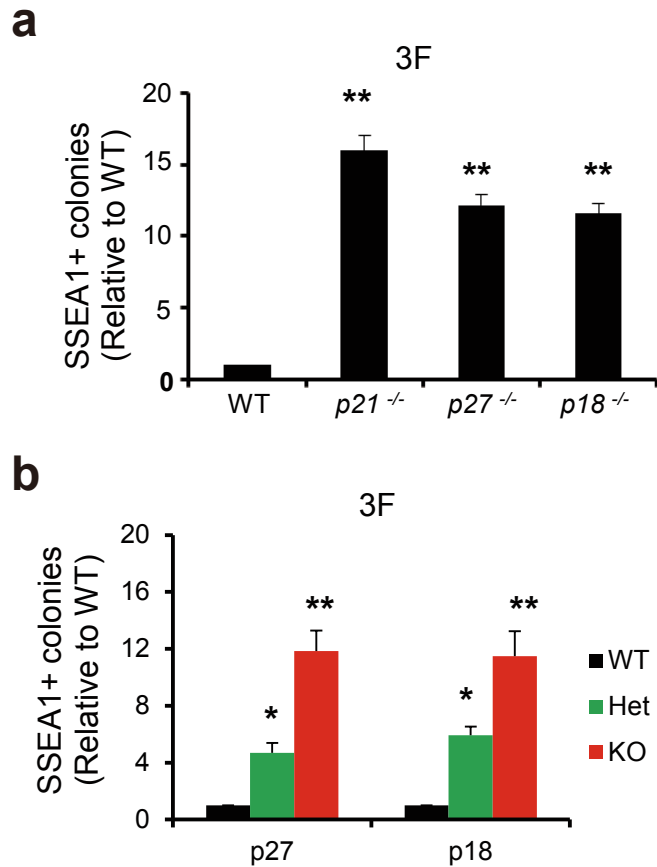

**Supplemental Figure 2** Effects of absence of p21, p27, or p18 on iPSC generation by transduction with three factors (Oct4, Sox2 and Klf4).

- a) SSEA1 positive colonies derived from different genotype MEFs relative to that from WT MEFs at reprogramming day 14 by transduction with three factors (Oct4, Sox2 and Klf4).
- b) SSEA1 positive colonies in *p27*<sup>+/-</sup>, *p27*<sup>-/-</sup>, *p18*<sup>+/-</sup>, and *p18*<sup>-/-</sup> iPSCs relative to that of WT iPSCs at day 14 after transduction with three factors.

Data are representative of two or three independent experiments. Error bars,  $\pm$ SD. \*,  $p < 0.05$ ; \*\*,  $p < 0.01$ , by two-tailed *t* test.
